# Supplementary material for: Lactobacillus paracasei CCFM1229 and Lactobacillus rhamnosus CCFM1228 Alleviated Depression- and Anxiety-Related Symptoms of Chronic Stress-Induced Depression in Mice by Regulating Xanthine Oxidase Activity in the Brain
Source: MDPI journal article supplement (doi:10.3390/nu14061294), 2022-03-18
Supplement: s1 [file s1]

# **Supplementary materials**

## **Materials and methods**

### **1. Modeling scheme of chronic unpredictable stress**

Chronic unpredictable stress includes the following 10 stimuli :(1) fasting for 24 hours; (2) No water + empty bottle stimulation for 24h; (3) The tail was clamped for 3min, repeated three times; (4) Wet bedding for 24h; (5) Brake restraint for 6h; (6) Forced swimming for 15 minutes; (7) Solitary rearing for 24 hours; (8) Continuous illumination for 24h; (9) no bedding material; (10) Crowded stimulation. Avoid biorhythms and apply 2 of them randomly each day.

### **2. Detailed plan of the behavioral experiments**

#### **(1) Open field test**

The experiment was carried out in a quiet environment. After the animals were put into the open field center, timing and video recording were immediately started, and the video recording was stopped after 10min observation. When changing animals, in order to avoid affecting the results of the next test, it is necessary to clean the inner wall and bottom surface of the open field first to remove the information left by the last animal (such as urine, feces, smell, etc.). EthoVision software was used for digital analysis of the video, and the percentage of time the mice stayed in the central area of the open field was calculated :( $\text{Residence time in the central area of the open field} / \text{total monitoring time}$ )  $\times 100\%$ .

#### **(2) Marble burying test**

Lay a 5 cm thick corncob mat in the cage, and smooth it out. Put 20 glass beads (15 mm in diameter) into corn cob bedding, divided into five rows, each row of 4, regular arrangement. The mice were placed in the cage and videotaped for 30 min. Pave the pad and reuse it. Count the number of buried

glass beads (buried volume more than 50%).

### **(3) Light/dark box test**

The mice were placed in the open box and placed in the center compartment of the shuttle box. The EthoVision real-time monitoring system was used to record the activity of the mice for 5min, and the number of mice entering the open box was calculated.

### **(4) Tail suspension test**

The tail suspension test is similar to the forced swimming experiment in that it is a model of behavioral desperation. The rear 1/3 of the mouse tail was fixed with adhesive tape, suspended on the bracket, the head was 30cm away from the table, and the camera was taken. The background of the camera was in obvious contrast with the mouse hair color. The mice were timed for 5min and stopped. The immobility time of the mice was statistically analyzed by the small animal behavior analysis software. Among them, immobile state refers to the animal giving up the active struggle, in the state of complete immobility.

### **(5) Forced swimming test**

About 2.2L of water was stored in the 3L experimental bucket at a temperature of  $24\pm 1^{\circ}\text{C}$ . 24 hours before the formal experiment, each mouse underwent adaptive swimming training for 10 minutes. In the formal experiment, each mouse underwent a six-minute swimming test. EthoVision real-time monitoring system was used for video recording and analysis, and the Immobility time of mice was calculated (Immobility was defined as immobility of limbs or slight movement of hind limbs).

## Supplementary results

**Table S1 Genus and sources of probiotics.**

| Text number | Original number | Genus                | Source                        |
|-------------|-----------------|----------------------|-------------------------------|
| 132M1       | V-GZTR-132-M1   | <i>L. helveticus</i> | pickles                       |
| 126L6       | VCQBB4126L6     | <i>L. paracasei</i>  | pickle water                  |
| CCFM1229    | VCQYB7171M7     | <i>L. paracasei</i>  | pickle water                  |
| 29L1        | FZJHZD29L1      | <i>L. paracasei</i>  | adult feces                   |
| 8G3         | 8G3             | <i>L. helveticus</i> | wooden house, backer, outdoor |
| 4L3         | FHNFQ4L3        | <i>L. paracasei</i>  | baby feces                    |
| Q7M66       | DQHYNQ07 M66    | <i>L. helveticus</i> | Qula                          |
| 10M6        | FSDJN10M6       | <i>L. helveticus</i> | adult feces                   |
| CCFM1131    | FHuBei281       | <i>L. rhamnosus</i>  | feces of long-lived elderly   |
| CCFM1130    | FBJCY31         | <i>L. rhamnosus</i>  | baby feces                    |
| CCFM1132    | FZJTZ20M3       | <i>L. reuteri</i>    | adult feces                   |
| CCFM1228    | FAHWH30L7       | <i>L. rhamnosus</i>  | feces from healthy old people |
| 11M59       | DYNDL11M59      | <i>L. reuteri</i>    | sweet pulp                    |

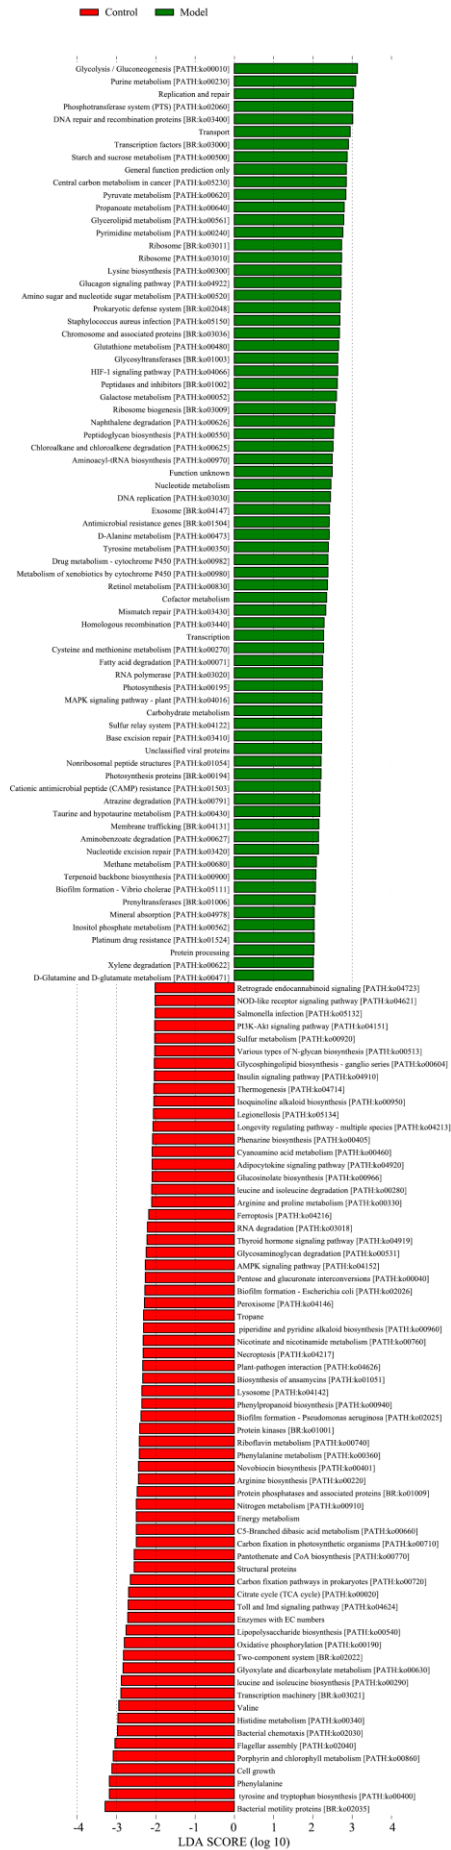

**Figure S1** LEfSe analysis revealed 139 different functional categories between control and depressed mice.

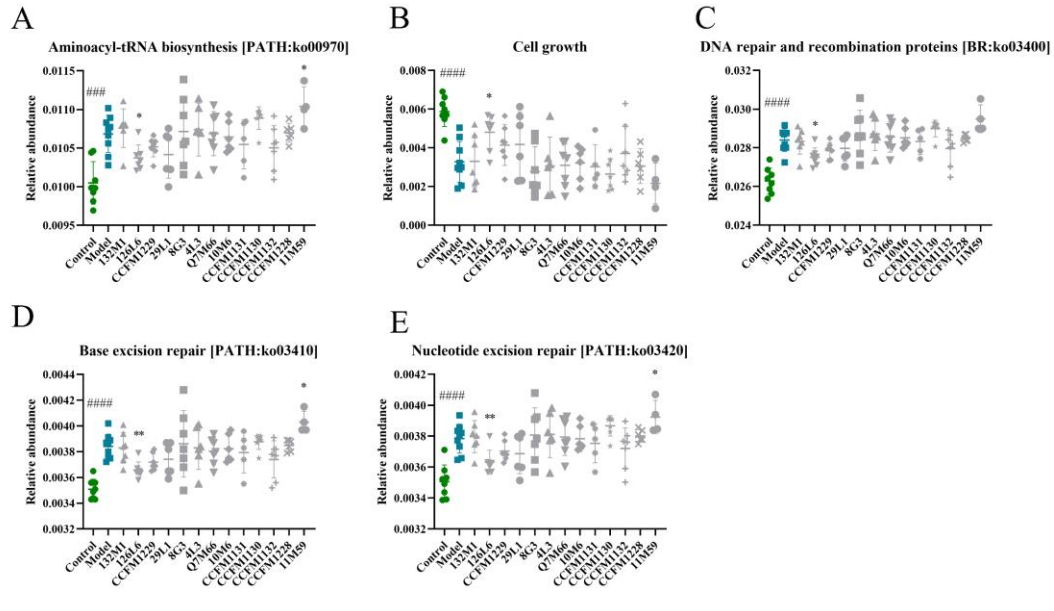

**Figure S2** KEGG function prediction of 16S rRNA by PICRUST2. (A) Aminoacyl-tRNA biosynthesis. (B) Cell growth. (C) DNA repair and recombination proteins. (D) Base excision repair. (E) Nucleotide excision repair. \* $P < 0.05$ ; \*\* $P < 0.01$ ; \*\*\* $P < 0.001$  comparing with depression group.

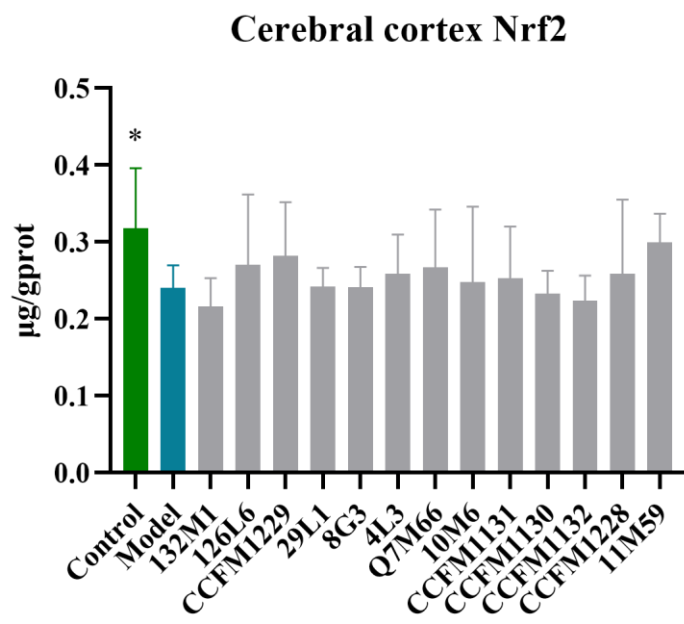

**Figure S3** Nrf2 level in mouse cerebral cortex. \* $P < 0.05$ .
